# Supplementary material for: The peers expanding engagement in stimulant harm reduction with contingency management study: a protocol paper
Source: Springer Nature journal article supplement (doi:10.1186/s13722-025-00577-8), 2025-06-10
Supplement: MOESM1 [file 13722_2025_577_MOESM1_ESM.pdf]

# INCENTIVIZED GOAL-RELATED ACTIVITIES

## PEER-CM Project: Participant Handout

December 2024

### GOALS AND ACTIVITIES ARE ORGANIZED ACROSS THE FOLLOWING 6 DOMAINS:

- Domain 1: Overdose/Overamping Prevention and Risk Reduction Planning
- Domain 2: Substance Use/Recovery Supports
- Domain 3: Daily Living, Routines, and Housing
- Domain 4: Education, Employment, and Finances
- Domain 5: Mental, Physical, and Spiritual Health
- Domain 6: Social, Recreational, Relationships, and Family

### Domain 1: Overdose/Overamping Prevention and Risk Reduction Planning

| Goal                                        | Incentivized Activity                                                                                                                                                                                                                                                                                                                                                                                                                                                                     | Activity Completed       |
|---------------------------------------------|-------------------------------------------------------------------------------------------------------------------------------------------------------------------------------------------------------------------------------------------------------------------------------------------------------------------------------------------------------------------------------------------------------------------------------------------------------------------------------------------|--------------------------|
| Make plans to prevent overdose / overamping | <ul style="list-style-type: none"><li>▶ Complete <b>overamping</b> prevention training and create a written plan</li><li>• Meet in a place where you can have an in-depth conversation with few interruptions.</li><li>• Use template provided.</li><li>• Peer can print plan, send plan by text, or document in RecoveryLink.</li><li>• Include details about picking up harm reduction supplies, getting naloxone refills, supporting each other, etc. (guidance in template)</li></ul> | <input type="checkbox"/> |
|                                             | <ul style="list-style-type: none"><li>▶ Complete <b>overdose</b> prevention training and create a written plan</li><li>• Meet in a place where you can have an in-depth conversation with few interruptions.</li><li>• Use template provided.</li><li>• Peer can print plan, send plan by text, or document in RecoveryLink.</li><li>• Include details about picking up harm reduction supplies, getting naloxone refills, supporting each other, etc. (guidance in template)</li></ul>   | <input type="checkbox"/> |
|                                             | <ul style="list-style-type: none"><li>▶ Do “teach-back” of key counseling handout points (or teach another person) and demonstrate overdose reversal</li></ul>                                                                                                                                                                                                                                                                                                                            | <input type="checkbox"/> |

| Goal                                                                 | Incentivized Activity                                                                                                                                                                                                                                                                                                                                                                                                                                                                                                                                                                                                                                                  | Activity Completed       |
|----------------------------------------------------------------------|------------------------------------------------------------------------------------------------------------------------------------------------------------------------------------------------------------------------------------------------------------------------------------------------------------------------------------------------------------------------------------------------------------------------------------------------------------------------------------------------------------------------------------------------------------------------------------------------------------------------------------------------------------------------|--------------------------|
| <b>Update and revise overdose and/or overamping prevention plans</b> | <ul style="list-style-type: none"> <li>▶ Review personal plan with peer (including plan for supplies refills) and make updates</li> <li>• Meet in a place where you can have an in-depth conversation with few interruptions.</li> <li>• Occurs at least one month after the overdose/overamping plan was developed.</li> </ul>                                                                                                                                                                                                                                                                                                                                        | <input type="checkbox"/> |
| <b>Make a plan for substance use or risk reduction</b>               | <ul style="list-style-type: none"> <li>▶ Create a written substance use/risk reduction plan aside from overdose/overamping</li> <li>• Meet in a place where you can have an in-depth conversation with few interruptions.</li> <li>• Use template provided.</li> <li>• Peer can print plan, send plan by text, or document in RecoveryLink.</li> <li>• Include details about specific activities related to reducing substance use or using more safely; may include plan for supports needed (plan for accessing safer use supplies, changing use to reduce wounds or infectious disease, changing patterns to reduce use, contacting support people, etc)</li> </ul> | <input type="checkbox"/> |

## Domain 2: Substance Use / Recovery Supports

| Goal                             | Incentivized Activity                                                                    | Activity Completed       |
|----------------------------------|------------------------------------------------------------------------------------------|--------------------------|
| <b>Start treatment of choice</b> | ▶ Schedule intake or appointment with a treatment program or addiction medicine provider | <input type="checkbox"/> |
|                                  | ▶ Attend intake or appointment with a treatment program or addiction medicine provider   | <input type="checkbox"/> |
|                                  | ▶ Start medication for substance use like methadone, buprenorphine, naltrexone           | <input type="checkbox"/> |
| <b>Engage in recovery events</b> | ▶ Attend a mutual support meeting (such as 12-step, Smart Recovery)                      | <input type="checkbox"/> |
|                                  | ▶ Attend a recovery event or services                                                    | <input type="checkbox"/> |

| Goal                                                    | Incentivized Activity                                                                                                                                                                  | Activity Completed       |
|---------------------------------------------------------|----------------------------------------------------------------------------------------------------------------------------------------------------------------------------------------|--------------------------|
| <b>Engage in culturally specific services</b>           | ▶ Attend a culturally specific event or service                                                                                                                                        | <input type="checkbox"/> |
|                                                         | ▶ Attend sweat lodge, talking circle, or drum circle                                                                                                                                   | <input type="checkbox"/> |
| <b>Identify a recovery sponsor/elder/support person</b> | ▶ Identify a recovery support person and ask for their phone number                                                                                                                    | <input type="checkbox"/> |
|                                                         | ▶ Meet with recovery support person by phone or in person                                                                                                                              | <input type="checkbox"/> |
| <b>Refer someone else to services</b>                   | ▶ Bring someone from social circles in or tell someone about services<br>• Can include peer-delivered services, culturally specific services, or other treatment and recovery services | <input type="checkbox"/> |

### Domain 3: Daily Living, Routines, and Housing

| Goal                        | Incentivized Activity                                                                                                                                                                                                                                                                   | Activity Completed       |
|-----------------------------|-----------------------------------------------------------------------------------------------------------------------------------------------------------------------------------------------------------------------------------------------------------------------------------------|--------------------------|
| <b>Get driver's license</b> | ▶ Gather information about what is needed to get driver's license. For example:<br>• Go online to locate the steps to getting a driver's license.<br>• Explore if there are any outstanding tickets to be paid.<br>• Go to DMV or online to request the driver's written test workbook. | <input type="checkbox"/> |
|                             | ▶ Complete requirements to get driver's license. For example:<br>• Pay outstanding ticket(s)<br>• Gather necessary documents (e.g., birth certificate)<br>• Complete the application form<br>• Schedule driving test                                                                    | <input type="checkbox"/> |

| Goal                          | Incentivized Activity                                                                                                                                                                                                                              | Activity Completed       |
|-------------------------------|----------------------------------------------------------------------------------------------------------------------------------------------------------------------------------------------------------------------------------------------------|--------------------------|
|                               | ▶ Complete driving test                                                                                                                                                                                                                            | <input type="checkbox"/> |
| <b>Get ID card</b>            | ▶ Gather information about what is needed to get ID card. For example: <ul style="list-style-type: none"> <li>Go online to locate the steps to getting ID card.</li> <li>Gather required documents for appointment.</li> </ul>                     | <input type="checkbox"/> |
|                               | ▶ Complete requirements to get ID card. For example: <ul style="list-style-type: none"> <li>Gather necessary documents (e.g., birth certificate)</li> <li>Complete the application form</li> <li>Schedule appointment</li> </ul>                   | <input type="checkbox"/> |
|                               | ▶ Go to DMV and complete steps to get ID card                                                                                                                                                                                                      | <input type="checkbox"/> |
| <b>Improve access to food</b> | ▶ Gather information to sign up for Supplemental Nutrition Assistance Program (SNAP)                                                                                                                                                               | <input type="checkbox"/> |
|                               | ▶ Complete requirements to sign up for SNAP.                                                                                                                                                                                                       | <input type="checkbox"/> |
|                               | ▶ Sign up for SNAP                                                                                                                                                                                                                                 | <input type="checkbox"/> |
| <b>Secure housing</b>         | ▶ Gather information about programs. For example: <ul style="list-style-type: none"> <li>Gather necessary documents (e.g., eligibility paperwork)</li> <li>Schedule meeting with housing counselor</li> <li>Meet with housing counselor</li> </ul> | <input type="checkbox"/> |
|                               | ▶ Complete requirements to secure housing. For example: <ul style="list-style-type: none"> <li>Gather necessary documents (e.g., birth certificate)</li> <li>Complete the application form</li> <li>Schedule appointment</li> </ul>                | <input type="checkbox"/> |

| Goal                        | Incentivized Activity                                                                                                                                                                                                        | Activity Completed       |
|-----------------------------|------------------------------------------------------------------------------------------------------------------------------------------------------------------------------------------------------------------------------|--------------------------|
|                             | ► Apply for Public Housing and Housing Choice Vouchers (Section 8) at local Public Housing Agency                                                                                                                            | <input type="checkbox"/> |
|                             | ► Apply for other housing (e.g., Oxford, low-income)                                                                                                                                                                         | <input type="checkbox"/> |
| <b>Improve legal status</b> | ► Attend appointment with probation/parole officer                                                                                                                                                                           | <input type="checkbox"/> |
|                             | ► Gather information about legal record. For example: <ul style="list-style-type: none"> <li>• Request information about active warrants</li> </ul>                                                                          | <input type="checkbox"/> |
|                             | ► Complete requirements to improve legal status: For example: <ul style="list-style-type: none"> <li>• Resolve active warrants</li> <li>• Attend classes (e.g., MRT) and complete other stipulations of probation</li> </ul> | <input type="checkbox"/> |
|                             | ► Attend appointment with DHS case worker                                                                                                                                                                                    | <input type="checkbox"/> |

Other non-incentivized activities in Domain 3:

- Paying legal or probation/parole monthly fees

## Domain 4: Education, Employment, and Finances

| Goal                            | Incentivized Activity                                                                                                                                                | Activity Completed       |
|---------------------------------|----------------------------------------------------------------------------------------------------------------------------------------------------------------------|--------------------------|
| <b>Further education</b>        | ► Gather information about exams, courses, programs                                                                                                                  | <input type="checkbox"/> |
|                                 | ► Complete requirements for this goal. For example: <ul style="list-style-type: none"> <li>• Complete financial aid forms</li> <li>• Register for classes</li> </ul> | <input type="checkbox"/> |
| <b>Get specialized training</b> | ► Gathering information about certification, trainings, courses, and programs                                                                                        | <input type="checkbox"/> |

| Goal                                     | Incentivized Activity                                                                                                                                                                                                                                                                                             | Activity Completed       |
|------------------------------------------|-------------------------------------------------------------------------------------------------------------------------------------------------------------------------------------------------------------------------------------------------------------------------------------------------------------------|--------------------------|
|                                          | <ul style="list-style-type: none"> <li>▶ Complete requirements for this goal. For example:               <ul style="list-style-type: none"> <li>• Complete financial aid forms</li> <li>• Register for programs</li> </ul> </li> </ul>                                                                            | <input type="checkbox"/> |
| <b>Secure a job</b>                      | <ul style="list-style-type: none"> <li>▶ Gather information about securing a job. For example:               <ul style="list-style-type: none"> <li>• Identify jobs, make lists, circle ads in newspaper</li> <li>• Explore temp agency opportunities</li> <li>• Meet with a job counselor</li> </ul> </li> </ul> | <input type="checkbox"/> |
|                                          | <ul style="list-style-type: none"> <li>▶ Complete requirements for securing a job. For example:               <ul style="list-style-type: none"> <li>• Develop resume</li> <li>• Arrange for references</li> <li>• Gather information to ensure eligibility for employment (e.g., SS card)</li> </ul> </li> </ul> | <input type="checkbox"/> |
|                                          | <ul style="list-style-type: none"> <li>▶ Submit applications at specific places of employment</li> </ul>                                                                                                                                                                                                          | <input type="checkbox"/> |
|                                          | <ul style="list-style-type: none"> <li>▶ Go to job interviews</li> </ul>                                                                                                                                                                                                                                          | <input type="checkbox"/> |
|                                          |                                                                                                                                                                                                                                                                                                                   |                          |
| <b>Volunteer</b>                         | <ul style="list-style-type: none"> <li>▶ Gather information about volunteer opportunities</li> </ul>                                                                                                                                                                                                              | <input type="checkbox"/> |
|                                          | <ul style="list-style-type: none"> <li>▶ Sign up to volunteer</li> </ul>                                                                                                                                                                                                                                          | <input type="checkbox"/> |
|                                          | <ul style="list-style-type: none"> <li>▶ Go to volunteer opportunity</li> </ul>                                                                                                                                                                                                                                   | <input type="checkbox"/> |
| <b>Open a checking / savings account</b> | <ul style="list-style-type: none"> <li>▶ Identify bank or credit union</li> </ul>                                                                                                                                                                                                                                 | <input type="checkbox"/> |
|                                          | <ul style="list-style-type: none"> <li>▶ Open an account</li> </ul>                                                                                                                                                                                                                                               | <input type="checkbox"/> |

Other non-incentivized activities in Domain 4:

- Go to work regularly
- Miscellaneous (meet with boss, straighten out work schedule, give boss proof of tax status)

## Domain 5: Mental, Physical, and Spiritual Health

| Goal                                                    | Incentivized Activity                                                                                                                                                                                                                     | Activity Completed       |
|---------------------------------------------------------|-------------------------------------------------------------------------------------------------------------------------------------------------------------------------------------------------------------------------------------------|--------------------------|
| <b>Prevent or address physical health care concerns</b> | ▶ Enroll in OHP/Medicaid                                                                                                                                                                                                                  | <input type="checkbox"/> |
|                                                         | ▶ Make a doctor (primary care or specialist), dentist, eye appointment                                                                                                                                                                    | <input type="checkbox"/> |
|                                                         | ▶ Attend doctor (primary care or specialist), dentist, eye appointment                                                                                                                                                                    | <input type="checkbox"/> |
|                                                         | ▶ Complete follow-up health care appointment activities. For example: <ul style="list-style-type: none"> <li>• Fill prescription(s)</li> <li>• Complete recommended testing (e.g., blood draw)</li> <li>• Collect test results</li> </ul> | <input type="checkbox"/> |
|                                                         | ▶ Get screened for Hepatitis C, HIV, or syphilis                                                                                                                                                                                          | <input type="checkbox"/> |
|                                                         | ▶ Start Hepatitis C medication (if applicable)                                                                                                                                                                                            | <input type="checkbox"/> |
| <b>Access mental health care and supports</b>           | ▶ Schedule intake or appointment with a mental health provider.                                                                                                                                                                           | <input type="checkbox"/> |
|                                                         | ▶ Attend intake or appointment with a mental health provider                                                                                                                                                                              | <input type="checkbox"/> |
|                                                         | ▶ Start medication (if applicable)                                                                                                                                                                                                        | <input type="checkbox"/> |
|                                                         | ▶ Make plan to help with taking medications consistently, when to contact crisis line, etc.                                                                                                                                               | <input type="checkbox"/> |

| Goal                                    | Incentivized Activity                                | Activity Completed       |
|-----------------------------------------|------------------------------------------------------|--------------------------|
| <b>Build connection to spirituality</b> | ▶ Explore options for building spiritual connections | <input type="checkbox"/> |
|                                         | ▶ Attend events to build spiritual connections       | <input type="checkbox"/> |

## Domain 6: Social, Recreational, Relationships, and Family

| Goal                                                                            | Incentivized Activity                                                                                                                                                 | Activity Completed       |
|---------------------------------------------------------------------------------|-----------------------------------------------------------------------------------------------------------------------------------------------------------------------|--------------------------|
| <b>Build or strengthen relationships with children and other family members</b> | ▶ Go on outings with (grand)child. For example: <ul style="list-style-type: none"> <li>Go to the park</li> <li>Go to church</li> <li>Go on a walk</li> </ul>          | <input type="checkbox"/> |
|                                                                                 | ▶ Visit or assist relative. For example: <ul style="list-style-type: none"> <li>Nursing home or prison visit</li> <li>Take relative to medical appointment</li> </ul> | <input type="checkbox"/> |
|                                                                                 | ▶ Write a letter to relative                                                                                                                                          | <input type="checkbox"/> |
|                                                                                 | ▶ Attend social events with specific relatives                                                                                                                        | <input type="checkbox"/> |
| <b>Engage in positive activities</b>                                            | ▶ Make list of leisure, recreational, exercise activities to do. Example of activities may include: go to gym, walk in the park, call friend                          | <input type="checkbox"/> |
|                                                                                 | ▶ Attend leisure, recreational, or exercise activities                                                                                                                | <input type="checkbox"/> |
|                                                                                 | ▶ Complete or work on art/craft                                                                                                                                       | <input type="checkbox"/> |
